# Supplementary material for: Characterization of an RNA binding protein interactome reveals the targetable post-transcriptional landscape of MYC-amplified medulloblastoma
Source: Research Square preprint supplement (doi:10.21203/rs.3.rs-549885/v1), 2022-03-28
Supplement: Supplementary file 1 [file d1093b4da8ef22777ef1f1d6.docx]

**Supplementary tables**

**Supplementary Table 1:** Top 50 reproducible peaks per IDR identified and quantified in SU_MB002

| **Chromosome** | **Log20*p*** | **log2FC** | **Strand** | **Gene ID** | **Gene name** | **Binding location** |
| --- | --- | --- | --- | --- | --- | --- |
| chr12 | 130.9069785 | 8.777033777 | + | ENSG00000111678.6 | **C12orf57** | 5utr |
| chr12 | 85.29091126 | 7.902410526 | - | ENSG00000060982.10 | **BCAT1** | 3utr |
| chr5 | 81.07294875 | 6.837477208 | + | ENSG00000015479.13 | **MATR3** | 3utr |
| chr20 | 59.91804093 | 5.840674085 | - | ENSG00000200494.1 | **Y_RNA** | noncoding exon |
| chr16 | 52.57756841 | 7.25922924 | - | ENSG00000170540.10 | **ARL6IP1** | 3utr |
| chr7 | 43.64426868 | 6.247806948 | + | ENSG00000242265.1 | **PEG10** | 3utr |
| chr1 | 42.91109846 | 5.029559045 | - | ENSG00000173726.6 | **TOMM20** | 3utr |
| chrM | 42.58447578 | 5.321081504 | - | ENSG00000210196.2 | **MT-TP** | noncoding exon |
| chr12 | 40.45456608 | 6.985242013 | + | ENSG00000179195.11 | **ZNF664** | 3utr |
| chr4 | 38.53043893 | 5.423984001 | - | ENSG00000118816.5 | **CCNI** | 3utr |
| chr11 | 37.7841246 | 3.556087385 | + | ENSG00000251562.3 | **MALAT1** | noncoding exon |
| chr21 | 37.58937087 | 6.769725775 | + | ENSG00000198743.5||  ENSG00000272962.1 | **SLC5A3** | 3utr |
| chr12 | 37.534259 | 6.783979979 | + | ENSG00000149948.9 | **HMGA2** | 3utr |
| chr12 | 36.87039582 | 4.937627988 | + | ENSG00000135486.13 | **HNRNPA1** | 3utr |
| chr15 | 35.15934931 | 6.779854277 | - | ENSG00000140391.10 | **TSPAN3** | 3utr |
| chrX | 34.96593011 | 5.784971341 | + | ENSG00000102144.9 | **PGK1** | 3utr |
| chr16 | 34.59372627 | 5.786678363 | + | ENSG00000091651.4 | **ORC6** | 3utr |
| chr15 | 33.25813174 | 4.433604362 | - | ENSG00000247809.3 | **NR2F2-AS1** | noncoding exon |
| chr12 | 33.05641151 | 4.857046447 | + | ENSG00000008394.8 | **MGST1** | 3utr |
| chr3 | 32.55258876 | 5.055059351 | + | ENSG00000156976.10 | **EIF4A2** | 3utr |
| chr17 | 32.18120884 | 6.646291422 | - | ENSG00000136450.8 | **SRSF1** | 3utr |
| chr6 | 31.84807882 | 5.022863505 | + | ENSG00000196230.8 | **TUBB** | 3utr |
| chrX | 31.5259295 | 4.410543501 | + | ENSG00000147140.11 | **NONO** | 3utr |
| chrX | 29.91107758 | 5.51403978 | + | ENSG00000131171.8 | **SH3BGRL** | 3utr |
| chr10 | 29.71255077 | 5.561559347 | + | ENSG00000099194.5 | **SCD** | 3utr |
| chr11 | 29.59140392 | 4.938285787 | - | ENSG00000110321.11 | **EIF4G2** | 3utr |
| chrM | 28.99250656 | 6.49170087 | + | ENSG00000210164.1 | **MT-TG** | noncoding exon |
| chr2 | 27.53936702 | 5.455572826 | + | ENSG00000176887.5 | **SOX11** | 3utr |
| chr11 | 26.79778259 | 4.871195681 | - | ENSG00000152558.10 | **TMEM123** | 3utr |
| chr14 | 25.96881056 | 4.777721156 | - | ENSG00000174373.11 | **RALGAPA1** | 3utr |
| chr15 | 25.84084233 | 6.339717622 | - | ENSG00000140319.6 | **SRP14** | 3utr |
| chr16 | 25.65569263 | 6.375022115 | + | ENSG00000230989.2 | **HSBP1** | 3utr |
| chrX | 25.61407125 | 5.406349608 | + | ENSG00000102144.9 | **PGK1** | 3utr |
| chr22 | 24.90027276 | 6.23451097 | + | ENSG00000189060.4 | **H1F0** | 3utr |
| chr12 | 24.83009878 | 5.384932835 | - | ENSG00000187109.9 | **NAP1L1** | 3utr |
| chr7 | 24.31613848 | 6.244869532 | - | ENSG00000105810.5 | **CDK6** | 3utr |
| chr11 | 24.0579986 | 4.941801413 | + | ENSG00000134333.9 | **LDHA** | 3utr |
| chr14 | 23.33098965 | 4.727164562 | - | ENSG00000080824.14 | **HSP90AA1** | 3utr |
| chr2 | 23.29552509 | 6.115726965 | + | ENSG00000170144.14 | **HNRNPA3** | 3utr |
| chr8 | 23.23874893 | 3.352849272 | - | ENSG00000070756.9 | **PABPC1** | CDS |
| chr14 | 22.97695342 | 4.21446932 | + | ENSG00000100941.4 | **PNN** | CDS |
| chr6 | 22.94225784 | 3.025370111 | + | ENSG00000112306.7 | **RPS12** | CDS |
| chr17 | 22.91814631 | 6.284106912 | + | ENSG00000129657.10 | **SEC14L1** | 3utr |
| chr2 | 22.11627158 | 4.257377881 | - | ENSG00000115758.8 | **ODC1** | 3utr |
| chr16 | 21.94445387 | 6.010600185 | - | ENSG00000167005.9 | **NUDT21** | 3utr |
| chr22 | 21.89832131 | 4.292426182 | - | ENSG00000184117.7 | **NIPSNAP1** | 3utr |
| chr10 | 20.96114468 | 5.994796425 | + | ENSG00000148798.5 | **INA** | 3utr |
| chr5 | 20.57943831 | 4.990571912 | + | ENSG00000131507.9 | **NDFIP1** | 3utr |
| chr18 | 20.56341885 | 5.887381237 | + | ENSG00000101557.10 | **USP14** | 3utr |

**Supplementary Table 2:** Top 50 of reproducible peaks per IDR identified and quantified in NSC201cb

| **Chromosome** | **log10*p*** | **log2FC** | **Strand** | **Gene ID** | **Gene name** | **Binding location** |
| --- | --- | --- | --- | --- | --- | --- |
| chr13 | 217.7647656 | 8.017232101 | + | ENSG00000136156.8 | **ITM2B** | 3utr |
| chr3 | 114.1054669 | 7.135879065 | + | ENSG00000044524.6 | **EPHA3** | 3utr |
| chr21 | 112.7230695 | 7.091495696 | - | ENSG00000142192.16 | **APP** | 3utr |
| chr16 | 92.69099682 | 7.539088307 | - | ENSG00000170540.10 | **ARL6IP1** | 3utr |
| chr17 | 90.75969817 | 6.398451659 | + | ENSG00000129657.10 | **SEC14L1** | 3utr, CDS |
| chrX | 85.6133828 | 6.297131384 | - | ENSG00000046653.10 | **GPM6B** | 3utr, CDS |
| chr3 | 85.25096298 | 6.689735973 | + | ENSG00000044524.6 | **EPHA3** | 3utr |
| chr5 | 84.74867819 | 4.711242582 | - | ENSG00000113140.6 | **SPARC** | 3utr |
| chr10 | 84.74438984 | 5.014445832 | + | ENSG00000026025.9 | **VIM** | 3utr |
| chr5 | 84.17973284 | 4.621682212 | + | ENSG00000127022.10 | **CANX** | 3utr |
| chr1 | 83.22261668 | 4.31953998 | - | ENSG00000132688.10 | **NES** | 3utr |
| chr10 | 80.08848551 | 3.836734099 | - | ENSG00000197746.9 | **PSAP** | 3utr |
| chr10 | 78.04203853 | 3.921922292 | + | ENSG00000099194.5 | **SCD** | 3utr |
| chr4 | 76.29918028 | 6.849455618 | - | ENSG00000150625.12 | **GPM6A** | 3utr |
| chr2 | 74.17232709 | 3.208316853 | - | ENSG00000115461.4 | **IGFBP5** | 3utr |
| chr7 | 74.07030771 | 8.019971227 | + | ENSG00000106278.7 | **PTPRZ1** | 3utr |
| chr17 | 72.02050626 | 4.184159196 | - | ENSG00000035862.8 | **TIMP2** | 3utr |
| chr16 | 66.89720728 | 6.438424985 | + | ENSG00000087245.8 | **MMP2** | 3utr |
| chr5 | 64.89389141 | 7.499908527 | + | ENSG00000131507.9 | **NDFIP1** | 3utr |
| chr2 | 64.76386598 | 5.371633971 | - | ENSG00000115310.13 | **RTN4** | 3utr |
| chr4 | 62.57174239 | 7.757839672 | - | ENSG00000145284.7 | **SCD5** | 3utr |
| chr2 | 59.90751481 | 6.499205975 | + | ENSG00000138448.7 | **ITGAV** | 3utr |
| chr3 | 57.7510219 | 6.440111785 | - | ENSG00000249992.1 | **TMEM158** | 3utr |
| chr7 | 56.37072295 | 4.367158893 | - | ENSG00000146674.10 | **IGFBP3** | 3utr |
| chr4 | 56.36812144 | 7.620212461 | - | ENSG00000150625.12 | **GPM6A** | 3utr |
| chr5 | 55.42376234 | 3.673434928 | - | ENSG00000019582.10 | **CD74** | 3utr |
| chr5 | 55.04095317 | 6.93175982 | + | ENSG00000131711.10 | **MAP1B** | 3utr |
| chr4 | 53.51981046 | 5.968547023 | + | ENSG00000118785.9 | **SPP1** | 3utr |
| chrX | 53.24762415 | 6.144752641 | + | ENSG00000071553.12 | **ATP6AP1** | 3utr |
| chr8 | 52.25320783 | 7.709703391 | + | ENSG00000168615.7 | **ADAM9** | 3utr |
| chr6 | 52.17422996 | 3.019355171 | + | ENSG00000204580.7 | **DDR1** | 3utr |
| chr15 | 51.0747137 | 4.097832924 | - | ENSG00000067225.13 | **PKM** | 3utr |
| chr5 | 49.88087911 | 6.489699082 | + | ENSG00000131711.10 | **MAP1B** | 3utr |
| chr8 | 49.5919976 | 4.691394721 | - | ENSG00000164733.16 | **CTSB** | 3utr |
| chr15 | 48.98493379 | 4.106230029 | + | ENSG00000166710.13 | **B2M** | 3utr |
| chr16 | 48.85010379 | 4.952091381 | + | ENSG00000087245.8 | **MMP2** | 3utr |
| chr12 | 48.18395494 | 5.745688464 | + | ENSG00000174437.12 | **ATP2A2** | 3utr CDS |
| chr12 | 47.29393116 | 4.155004143 | + | ENSG00000111640.10 | **GAPDH** | 3utr |
| chr15 | 46.05393111 | 4.025920892 | - | ENSG00000067225.13 | **PKM** | 3utr |
| chr1 | 45.7614308 | 7.389914631 | + | ENSG00000117600.8 | **LPPR4** | 3utr |
| chr2 | 43.85614242 | 5.036419588 | + | ENSG00000213639.5 | **PPP1CB** | 3utr |
| chr11 | 42.72397501 | 3.390281252 | + | ENSG00000134824.9 | **FADS2** | 3utr |
| chr6 | 40.54225356 | 6.030715387 | - | ENSG00000112276.9 | **BVES** | 3utr |
| chr10 | 40.29638693 | 5.680760829 | + | ENSG00000107984.5 | **DKK1** | 3utr |
| chr1 | 39.7511933 | 4.808361811 | - | ENSG00000171603.12 | **CLSTN1** | 3utr |
| chr5 | 39.74508304 | 7.120078512 | - | ENSG00000171617.9 | **ENC1** | 3utr |
| chr14 | 39.21487853 | 6.1380383 | - | ENSG00000080824.14 | **HSP90AA1** | 3utr |
| chr17 | 38.6256614 | 5.395194207 | - | ENSG00000131095.7 | **GFAP** | 3utr |
| chr18 | 38.19222827 | 3.891465185 | - | ENSG00000170558.4 | **CDH2** | 3utr |
| chr3 | 37.00605891 | 5.801302771 | + | ENSG00000168036.12 | **CTNNB1** | 3utr |

**Supplementary Table 3:** Shared genes between SU_MB002 and NSC201cb (N=110)

| **GENE ID** | |
| --- | --- |
| ACTR2 | NHLRC2 |
| ANP32A | NONO |
| AP2B1 | NORAD |
| APP | NUCKS1 |
| ARL6IP1 | NUFIP2 |
| ARPP19 | NXN |
| ATP2A2 | PARP1 |
| ATP6AP2 | PFN2 |
| ATP6V1G1 | PGAM1 |
| ATPAF1 | PGK1 |
| AZIN1 | PPP1CB |
| CADM1 | PREPL |
| CALD1 | PRKAR1A |
| CALM1 | PTPRG |
| CALU | PTTG1IP |
| CANX | RAB11A |
| CCNI | RAC1 |
| CDC42 | RGMB |
| CDK6 | RNF187 |
| CKAP5 | RPN2 |
| CKB | RTN4 |
| CLIC4 | SCARB2 |
| CLSTN1 | SCD |
| CTNNB1 | SEC14L1 |
| DCBLD2 | SEPT11 |
| DDAH2 | SERINC1 |
| DRAP1 | SESN3 |
| DYNLL2 | SFXN3 |
| EIF4A2 | SLC16A1 |
| EIF4G2 | SLC38A2 |
| ELOVL6 | SLC39A14 |
| EPT1 | SLC39A6 |
| FAM168B | SLC5A3 |
| FSCN1 | SON |
| GLUL | SPCS1 |
| GNG12 | SPCS3 |
| GSE1 | SRP14 |
| GSPT1 | STOM |
| HIPK2 | TCF12 |
| HMGCS1 | TMBIM6 |
| HNRNPU | TMED7 |
| HSP90AA1 | TMEM123 |
| IGF1R | TMEM248 |
| LAPTM4B | TNPO1 |
| LDHA | TOMM20 |
| LIPA | TRIM9 |
| MAP1B | TROVE2 |
| MARCH6 | TSPAN3 |
| MARCKS | TTC3 |
| MARCKSL1 | TUBB |
| MLEC | WNK1 |
| NARS | YWHAG |
| NCKAP1 | ZDHHC9 |
| NDFIP1 | ZNF106 |
| NGRN | ZNF664 |

**Supplementary Table 4:** MSI1 eCLIP binding region counts for NSC201cb and SU_MB002

| **Binding Region** | **NSC201cb** | **SU_MB002** |
| --- | --- | --- |
| Coding Sequence | 2979 | 5021 |
| Distal intron | 3994 | 7842 |
| Proximal intron | 1407 | 1178 |
| 5' UTR | 173 | 160 |
| 3' UTR | 68795 | 83213 |
| Uncategorized | 678 | 1506 |

**Supplementary Table 5:** Associated MSI1 eCLIP bound gene pathways

| [**Term ID**](http://term.id) | [**Pathway**](http://term.name) | ***p*-value** | **NSC201cb** | **SU_MB002** |
| --- | --- | --- | --- | --- |
| GO:0006397 | mRNA processing | 3.96E-13 | 0 | 1 |
| GO:0008380 | RNA splicing | 4.25E-13 | 0 | 1 |
| GO:0043062 | extracellular structure organization | 4.57E-13 | 1 | 0 |
| GO:0000377 | RNA splicing, via transesterification reactions with bulged adenosine as nucleophile | 1.65E-12 | 0 | 1 |
| GO:0000398 | mRNA splicing, via spliceosome | 1.65E-12 | 0 | 1 |
| GO:0030198 | extracellular matrix organization | 2.29E-12 | 1 | 0 |
| GO:0000375 | RNA splicing, via transesterification reactions | 2.30E-12 | 0 | 1 |
| REAC:R-HSA-72163 | mRNA Splicing - Major Pathway | 4.75E-10 | 0 | 1 |
| REAC:R-HSA-72172 | mRNA Splicing | 1.43E-09 | 0 | 1 |
| GO:0050839 | cell adhesion molecule binding | 4.04E-09 | 1 | 0 |
| REAC:R-HSA-72203 | Processing of Capped Intron-Containing Pre-mRNA | 5.68E-09 | 0 | 1 |
| GO:0098589 | membrane region | 1.53E-08 | 1 | 0 |
| GO:0044437 | vacuolar part | 3.20E-08 | 1 | 0 |
| GO:0098857 | membrane microdomain | 4.85E-08 | 1 | 0 |
| GO:1903311 | regulation of mRNA metabolic process | 5.01E-08 | 0 | 1 |
| GO:0060284 | regulation of cell development | 5.06E-08 | 1 | 0 |
| REAC:R-HSA-1474244 | Extracellular matrix organization | 5.54E-08 | 1 | 0 |
| GO:0034655 | nucleobase-containing compound catabolic process | 6.23E-08 | 0 | 1 |
| GO:0031252 | cell leading edge | 6.62E-08 | 1 | 0 |
| GO:0006401 | RNA catabolic process | 8.55E-08 | 0 | 1 |
| GO:0006402 | mRNA catabolic process | 1.23E-07 | 0 | 1 |
| GO:0006403 | RNA localization | 1.95E-07 | 0 | 1 |
| GO:0045121 | membrane raft | 2.71E-07 | 1 | 0 |
| GO:0050767 | regulation of neurogenesis | 3.55E-07 | 1 | 0 |
| GO:0030175 | filopodium | 4.40E-07 | 1 | 0 |
| GO:0006413 | translational initiation | 5.21E-07 | 0 | 1 |
| GO:0006417 | regulation of translation | 8.23E-07 | 0 | 1 |
| GO:0051960 | regulation of nervous system development | 1.16E-06 | 1 | 0 |
| GO:0031589 | cell-substrate adhesion | 1.61E-06 | 1 | 0 |
| GO:0043312 | neutrophil degranulation | 2.23E-06 | 1 | 0 |
| GO:0030667 | secretory granule membrane | 2.46E-06 | 1 | 0 |
| GO:0002283 | neutrophil activation involved in immune response | 2.64E-06 | 1 | 0 |
| GO:0036464 | cytoplasmic ribonucleoprotein granule | 2.75E-06 | 0 | 1 |
| GO:0042119 | neutrophil activation | 4.13E-06 | 1 | 0 |
| GO:0002446 | neutrophil mediated immunity | 4.37E-06 | 1 | 0 |
| GO:0000904 | cell morphogenesis involved in differentiation | 5.22E-06 | 1 | 0 |
| GO:0006446 | regulation of translational initiation | 5.62E-06 | 0 | 1 |
| GO:0043202 | lysosomal lumen | 5.71E-06 | 1 | 0 |
| GO:0036230 | granulocyte activation | 5.74E-06 | 1 | 0 |
| GO:0034248 | regulation of cellular amide metabolic process | 7.60E-06 | 0 | 1 |
| GO:0035770 | ribonucleoprotein granule | 8.79E-06 | 0 | 1 |
| GO:0005775 | vacuolar lumen | 9.33E-06 | 1 | 0 |
| GO:0071826 | ribonucleoprotein complex subunit organization | 1.21E-05 | 0 | 1 |
| GO:0022618 | ribonucleoprotein complex assembly | 1.73E-05 | 0 | 1 |
| GO:0031344 | regulation of cell projection organization | 1.90E-05 | 1 | 0 |
| REAC:R-HSA-9006934 | Signaling by Receptor Tyrosine Kinases | 2.04E-05 | 1 | 0 |
| GO:0050657 | nucleic acid transport | 2.06E-05 | 0 | 1 |
| GO:0050658 | RNA transport | 2.06E-05 | 0 | 1 |
| GO:0070937 | CRD-mediated mRNA stability complex | 2.10E-05 | 0 | 1 |
| GO:0003727 | single-stranded RNA binding | 2.10E-05 | 0 | 1 |
| GO:0042063 | gliogenesis | 2.12E-05 | 1 | 0 |
| GO:0043487 | regulation of RNA stability | 2.34E-05 | 0 | 1 |
| GO:0120039 | plasma membrane bounded cell projection morphogenesis | 2.40E-05 | 1 | 0 |
| GO:0048858 | cell projection morphogenesis | 2.86E-05 | 1 | 0 |
| GO:0051236 | establishment of RNA localization | 2.87E-05 | 0 | 1 |
| GO:0098852 | lytic vacuole membrane | 2.88E-05 | 1 | 0 |
| GO:0005765 | lysosomal membrane | 2.88E-05 | 1 | 0 |
| GO:0015629 | actin cytoskeleton | 3.09E-05 | 1 | 0 |
| GO:0120035 | regulation of plasma membrane bounded cell projection organization | 3.13E-05 | 1 | 0 |
| GO:0031124 | mRNA 3'-end processing | 3.34E-05 | 0 | 1 |
| GO:0098858 | actin-based cell projection | 3.46E-05 | 1 | 0 |
| GO:0005788 | endoplasmic reticulum lumen | 3.50E-05 | 1 | 0 |
| GO:0010494 | cytoplasmic stress granule | 3.76E-05 | 0 | 1 |
| GO:0015931 | nucleobase-containing compound transport | 4.71E-05 | 0 | 1 |
| REAC:R-HSA-8957275 | Post-translational protein phosphorylation | 4.72E-05 | 1 | 0 |
| GO:0032990 | cell part morphogenesis | 5.05E-05 | 1 | 0 |
| GO:0043488 | regulation of mRNA stability | 5.23E-05 | 0 | 1 |
| GO:0031123 | RNA 3'-end processing | 5.48E-05 | 0 | 1 |
| GO:0006913 | nucleocytoplasmic transport | 5.49E-05 | 0 | 1 |
| REAC:R-HSA-6798695 | Neutrophil degranulation | 6.55E-05 | 1 | 0 |
| GO:0043235 | receptor complex | 6.64E-05 | 1 | 0 |
| GO:0030027 | lamellipodium | 6.77E-05 | 1 | 0 |
| GO:0051169 | nuclear transport | 6.82E-05 | 0 | 1 |
| REAC:R-HSA-381426 | Regulation of Insulin-like Growth Factor (IGF) transport and uptake by Insulin-like Growth Factor Binding Proteins | 6.82E-05 | 1 | 0 |
| GO:0030424 | axon | 8.26E-05 | 1 | 0 |
| GO:0006405 | RNA export from nucleus | 9.93E-05 | 0 | 1 |
| GO:0098797 | plasma membrane protein complex | 0.000103 | 1 | 0 |
| GO:0005518 | collagen binding | 0.000108 | 1 | 0 |
| GO:0051592 | response to calcium ion | 0.000115 | 1 | 0 |
| GO:0071277 | cellular response to calcium ion | 0.000126 | 1 | 0 |
| REAC:R-HSA-72766 | Translation | 0.000138 | 0 | 1 |
| GO:0048812 | neuron projection morphogenesis | 0.00015 | 1 | 0 |
| GO:0005635 | nuclear envelope | 0.000153 | 0 | 1 |
| GO:0030133 | transport vesicle | 0.000153 | 1 | 0 |
| GO:0007160 | cell-matrix adhesion | 0.000163 | 1 | 0 |
| GO:0000785 | chromatin | 0.000172 | 0 | 1 |
| GO:0005774 | vacuolar membrane | 0.000234 | 1 | 0 |
| GO:0051052 | regulation of DNA metabolic process | 0.00026 | 0 | 1 |
| REAC:R-HSA-216083 | Integrin cell surface interactions | 0.000274 | 1 | 0 |
| GO:0046916 | cellular transition metal ion homeostasis | 0.000279 | 0 | 1 |
| GO:0033627 | cell adhesion mediated by integrin | 0.000288 | 1 | 0 |
| REAC:R-HSA-2682334 | EPH-Ephrin signaling | 0.000289 | 1 | 0 |
| GO:0061564 | axon development | 0.000291 | 1 | 0 |
| GO:0072594 | establishment of protein localization to organelle | 0.000315 | 0 | 1 |
| GO:0071564 | npBAF complex | 0.000316 | 0 | 1 |
| REAC:R-HSA-4420097 | VEGFA-VEGFR2 Pathway | 0.00032 | 1 | 0 |
| GO:0030155 | regulation of cell adhesion | 0.000366 | 1 | 0 |
| GO:1903293 | phosphatase complex | 0.000369 | 0 | 1 |
| GO:0008287 | protein serine/threonine phosphatase complex | 0.000369 | 0 | 1 |
| GO:0050840 | extracellular matrix binding | 0.000435 | 1 | 0 |
| GO:0034330 | cell junction organization | 0.000439 | 1 | 0 |
| REAC:R-HSA-373755 | Semaphorin interactions | 0.000461 | 1 | 0 |
| GO:0071013 | catalytic step 2 spliceosome | 0.000462 | 0 | 1 |
| GO:0045664 | regulation of neuron differentiation | 0.000526 | 1 | 0 |
| GO:0032870 | cellular response to hormone stimulus | 0.000581 | 1 | 0 |
| REAC:R-HSA-195258 | RHO GTPase Effectors | 0.000595 | 1 | 1 |
| GO:0031346 | positive regulation of cell projection organization | 0.00061 | 1 | 0 |
| GO:0009611 | response to wounding | 0.000629 | 1 | 0 |
| GO:0061013 | regulation of mRNA catabolic process | 0.000649 | 0 | 1 |
| REAC:R-HSA-194138 | Signaling by VEGF | 0.000678 | 1 | 0 |
| GO:0045296 | cadherin binding | 0.00073 | 1 | 1 |
| GO:0031258 | lamellipodium membrane | 0.00081 | 1 | 0 |
| GO:0042382 | paraspeckles | 0.000853 | 0 | 1 |
| GO:0060627 | regulation of vesicle-mediated transport | 0.000863 | 1 | 0 |
| GO:0097435 | supramolecular fiber organization | 0.000882 | 1 | 0 |
| GO:0055076 | transition metal ion homeostasis | 0.000933 | 0 | 1 |
| GO:0048667 | cell morphogenesis involved in neuron differentiation | 0.000936 | 1 | 0 |
| GO:0032241 | positive regulation of nucleobase-containing compound transport | 0.00103 | 0 | 1 |
| GO:0046833 | positive regulation of RNA export from nucleus | 0.00103 | 0 | 1 |
| GO:0070934 | CRD-mediated mRNA stabilization | 0.00103 | 0 | 1 |
| REAC:R-HSA-114452 | Activation of BH3-only proteins | 0.00103 | 0 | 1 |
| REAC:R-HSA-5628897 | TP53 Regulates Metabolic Genes | 0.00104 | 0 | 1 |
| GO:0051168 | nuclear export | 0.00109 | 0 | 1 |
| GO:0003682 | chromatin binding | 0.00112 | 0 | 1 |
| GO:0070161 | anchoring junction | 0.00123 | 1 | 1 |
| GO:1903312 | negative regulation of mRNA metabolic process | 0.00126 | 0 | 1 |
| GO:0043489 | RNA stabilization | 0.00133 | 0 | 1 |
| GO:0007409 | axonogenesis | 0.00133 | 1 | 0 |
| GO:0120034 | positive regulation of plasma membrane bounded cell projection assembly | 0.00136 | 1 | 0 |
| REAC:R-HSA-156827 | L13a-mediated translational silencing of Ceruloplasmin expression | 0.00137 | 0 | 1 |
| GO:0032204 | regulation of telomere maintenance | 0.00147 | 0 | 1 |
| REAC:R-HSA-5627123 | RHO GTPases activate PAKs | 0.00147 | 1 | 0 |
| GO:0044770 | cell cycle phase transition | 0.00148 | 0 | 1 |
| GO:0098687 | chromosomal region | 0.00148 | 0 | 1 |
| GO:0060560 | developmental growth involved in morphogenesis | 0.00169 | 1 | 0 |
| GO:0010720 | positive regulation of cell development | 0.00171 | 1 | 0 |
| GO:0000139 | Golgi membrane | 0.00172 | 1 | 0 |
| GO:0098553 | lumenal side of endoplasmic reticulum membrane | 0.00172 | 1 | 0 |
| GO:0071556 | integral component of lumenal side of endoplasmic reticulum membrane | 0.00172 | 1 | 0 |
| GO:0005911 | cell-cell junction | 0.00175 | 1 | 0 |
| GO:0051491 | positive regulation of filopodium assembly | 0.00179 | 1 | 0 |
| GO:0008143 | poly(A) binding | 0.00185 | 0 | 1 |
| GO:0070820 | tertiary granule | 0.00185 | 1 | 0 |
| GO:0030658 | transport vesicle membrane | 0.00189 | 1 | 0 |
| GO:0005793 | endoplasmic reticulum-Golgi intermediate compartment | 0.00192 | 1 | 0 |
| REAC:R-HSA-6803529 | FGFR2 alternative splicing | 0.00193 | 0 | 1 |
| GO:0033116 | endoplasmic reticulum-Golgi intermediate compartment membrane | 0.00197 | 1 | 0 |

**Supplementary Table 6:** Pathway analysis of SU_MB002 MSI1-bound genes associated with chromatin remodeling, transcription and translation, JAK-STAT and TGF-β pathways

| **Chromatin, Transcription, Translation** | | | | | | **JAK-STAT** | **TGF- β** |
| --- | --- | --- | --- | --- | --- | --- | --- |
| ACTR2  AGO1  AKIRIN1  ANP32A  ANP32E  APP  ARHGAP42  ARHGEF12  ARID1A  ARL6IP1  ARPP19  ATP6V1G1  AUTS2  AZIN1  BACH1  BASP1  BAZ2A  BCAT1  BRD3  BTBD1  BUB3  C12ORF57  CADM1  CALD1  CALM1  CALM2  CAND1  CANX  CAPRIN1  CBFB  CBX3  CBX5  CCNB1IP1  CCNG1  CCNT1  CCT4  CCT5  CDC42  CDK6  CDKN2A  CENPF  CHERP  CKAP5  CKB  CLIC4  CNBP  CNOT6  COX7C  CPSF6  CSDE1  CTNNB1  CUL3  CYCS  DAAM1 | DCP2  DCTN4  DCTN5  DCTPP1  DDX1  DDX3X  DEK  DHX9  DKC1  DNAJC8  DPYSL2  DR1  DRAP1  DYNLL2  EID1  EIF1AX  EIF2A  EIF2S1  EIF2S3  EIF3E  EIF4A2  EIF4B  EIF4EBP2  EIF4G2  ELAVL1  ELOVL5  ELOVL6  EMC4  ENAH  EPB41  ERCC1  EXOC5  FAM172A  FHL1  FKBP1A  FSCN1  FUBP1  FYTTD1  G3BP1  GABARAPL2  GDI2  GLS  GNG12  GSPT1  GTF2F2  H1F0  H2AFV  H2AFY  H3F3B  HDGF  HELLS  HIPK1  HIPK2  HK2 | HLTF  HMGA2  HMGB2  HMGCR  HMGCS1  HMGN1  HNRNPA0  HNRNPA1  HNRNPA2B1  HNRNPA3  HNRNPD  HNRNPDL  HNRNPF  HNRNPH1  HNRNPH2  HNRNPH3  HNRNPR  HNRNPU  HPRT1  HSBP1  HSP90AA1  HSPA4  HSPA9  IGF2BP1  IGF2BP3  INA  INCENP  INSIG1  IPO7  JAM3  KHDRBS1  KIF5B  KPNA4  KRAS  LAMTOR3  LAMTOR5  LAPTM4B  LARP1  LARP4  LBR  LDHA  LIN28B  LIN7C  LNPEP  LONP2  LRPPRC  MAD2L1  MAGEF1  MAP1B  MAP1LC3B  MAPRE1  MARCH6  MARCKS  MCL1 | MCM4  MDN1  MORF4L2  MPZL1  MRPL42  MRPL48  MRPS28  MRPS30  MTPN  MXI1  MYC  NARS  NCBP2  NCKAP1  NDFIP1  NELL2  NEUROD1  NGRN  NOLC1  NONO  NPM1  NUCKS1  NUDT21  NUFIP2  NUP155  NUSAP1  ORC6  OTX2  PABPC1  PAICS  PAK2  PAPOLA  PARP1  PAWR  PCBP1  PCBP2  PDLIM5  PFN2  PGAM1  PGK1  PHF10  PNN  POLR2D  PPA1  PPP1CB  PPP1CC  PPP1R15B  PPP2CA  PPP3R1  PPP4R2  PRKAR1A  PRKDC  PRNP  PTBP2 | PTBP3  PTGES3  PTTG1IP  RAB11A  RAB1A  RAB21  RAC1  RACGAP1  RAD23B  RAN  RBBP4  RBFOX2  RBM14  RBMX  RERE  RLIM  RPL15  RPL22L1  RPL23A  RPL27A  RPL37  RPN2  RPS12  RPS23  RRM2  RSL24D1  RTN4  SCARB2  SCD  SEC11A  SERP1  SESN3  SF3B1  SFPQ  SKA2  SLBP  SLC25A36  SLC39A10  SLC39A14  SLC39A6  SMAD5  SMARCA4  SMARCC1  SMARCD1  SMARCE1  SMC1A  SMG1  SNX1  SOD1  SON  SOX11  SPCS1  SPCS3 | SQLE  SRP14  SRSF1  SRSF2  SRSF6  SSR3  SSU72  STAMBP  STMN1  STRAP  SUMO2  SYCP2L  SYNCRIP  SYNE2  TBL1XR1  TCF12  TFAM  TFDP2  TFRC  TGFBR1  TIMM13  TMBIM6  TMCO1  TMEM33  TMEM97  TMPO  TNPO1  TOMM20  TP53BP2  TPM4  TRIM9  TUBA1B  TUBB  TXNRD1  U2AF1  UBA52  UBE2J1  UNC119  UPF3B  URI1  USP14  USP33  WAC  WDR77  WDR82  XPOT  XRCC5  YWHAE  YWHAG  YWHAQ  YWHAZ  ZBTB18  ZNF638 | CANX  CDC42  HNRNPA2B1  HNRNPDL  HNRNPF  HSPA9  PAK2  SOD1 | CCNT1  DRAP1  FKBP1A  MYC  PPP1CB  PPP1CC  TFDP2  TGFBR1 |

**Supplementary Table 7:** Pathway analysis of NSC201cb MSI1-bound genes associated with chromatin remodeling, transcription and translation pathways

| **Chromatin, Transcription, Translation** |
| --- |
| ADAM9  ANXA2  AZIN1  BCAP31  CSNK1D  GFAP  GNA12  HIPK2  HSP90AA1  HSP90AB1  LAPTM4B  MAP1A  MSN  OAZ2  PTTG1IP  RAB7A  RDX  SGTA  TIMP2  TMTC3  TRIB2 |

**Supplementary Table 8:** Top 50 transcript differentially expressed (FDR<0.05) in control vs sh*MSI1*-inhibited samples identified and quantified

| **Gene ID** | **logFC** | ***p*-value** | **adj. *p*-value** |
| --- | --- | --- | --- |
| **SAMD11** | 6.011459384 | 3.97E-15 | 2.26E-11 |
| **ID1** | 5.963583538 | 4.16E-15 | 2.26E-11 |
| **SMAD9** | 3.935721549 | 3.71E-13 | 1.34E-09 |
| **GNGT1** | -3.292823676 | 2.19E-12 | 5.95E-09 |
| **FEZF1-AS1** | -2.567671031 | 3.84E-12 | 8.33E-09 |
| **TNC** | -2.310780904 | 1.24E-11 | 2.24E-08 |
| **DIAPH2-AS1** | -2.26936437 | 1.96E-11 | 3.04E-08 |
| **VXN** | -2.983732204 | 2.64E-11 | 3.21E-08 |
| **CCDC141** | 2.805275472 | 2.66E-11 | 3.21E-08 |
| **RXRG** | 2.692853253 | 4.27E-11 | 4.63E-08 |
| **KIRREL1** | 2.323398387 | 6.74E-11 | 6.64E-08 |
| **NID1** | -3.25026725 | 7.77E-11 | 7.02E-08 |
| **GABRR3** | -3.127691513 | 1.45E-10 | 1.21E-07 |
| **GPRC5B** | 3.721258921 | 4.78E-10 | 3.71E-07 |
| **ID3** | 4.378383972 | 5.76E-10 | 4.16E-07 |
| **C3orf70** | -3.045293789 | 1.03E-09 | 6.97E-07 |
| **SMAD6** | 3.938520964 | 1.33E-09 | 8.46E-07 |
| **ST8SIA3** | -2.876526013 | 1.52E-09 | 9.18E-07 |
| **EEF1A2** | 3.227050274 | 1.75E-09 | 1.00E-06 |
| **NEUROG1** | 2.342033954 | 1.94E-09 | 1.06E-06 |
| **RAB31** | 3.357439607 | 3.04E-09 | 1.57E-06 |
| **LIN28B** | 1.753633752 | 3.61E-09 | 1.68E-06 |
| **PRKCB** | -3.989528579 | 3.67E-09 | 1.68E-06 |
| **TSPAN18** | 2.305888732 | 3.76E-09 | 1.68E-06 |
| **UCHL1** | -3.37932154 | 3.87E-09 | 1.68E-06 |
| **CELF2** | -3.212076214 | 4.84E-09 | 2.02E-06 |
| **ARSI** | 3.043440189 | 5.04E-09 | 2.03E-06 |
| **SOAT1** | 2.035855402 | 5.39E-09 | 2.09E-06 |
| **CRABP2** | 2.110811056 | 6.09E-09 | 2.28E-06 |
| **KIAA2012** | 2.702318067 | 6.69E-09 | 2.42E-06 |
| **SYNPR** | 2.937504115 | 8.58E-09 | 3.00E-06 |
| **DOCK8** | 2.180837079 | 9.22E-09 | 3.13E-06 |
| **TRIM55** | -1.934371715 | 9.79E-09 | 3.22E-06 |
| **MCTP1** | -2.790540676 | 1.07E-08 | 3.41E-06 |
| **SPAG1** | -2.016176018 | 1.17E-08 | 3.64E-06 |
| **LIMCH1** | 2.327055316 | 1.76E-08 | 5.29E-06 |
| **REST** | 1.929339389 | 3.65E-08 | 1.07E-05 |
| **ETV3L** | 3.403079006 | 6.23E-08 | 1.78E-05 |
| **NRL** | 2.973061278 | 9.05E-08 | 2.52E-05 |
| **RALGAPA1** | -1.936989934 | 1.11E-07 | 3.00E-05 |
| **PTPN13** | 1.917199568 | 1.14E-07 | 3.00E-05 |
| **B4GALT1** | 2.399457238 | 1.29E-07 | 3.32E-05 |
| **CNTN1** | -1.942528026 | 1.40E-07 | 3.50E-05 |
| **NOX5** | -1.78678262 | 1.42E-07 | 3.50E-05 |
| **BASP1** | -1.574192654 | 1.84E-07 | 4.43E-05 |
| **SMYD1** | -2.462259577 | 2.35E-07 | 5.55E-05 |
| **MIOS** | 1.508871056 | 3.09E-07 | 7.12E-05 |
| **PCDH10** | -2.571616122 | 3.93E-07 | 8.71E-05 |
| **CHST2** | 2.418298282 | 3.93E-07 | 8.71E-05 |
| **IFI44** | -2.264241404 | 4.26E-07 | 9.08E-05 |

**Supplementary Table 9:** SU_MB002 and NSC201cb MSI1 eCLIP bound gene annotated as an RNA binding protein (RBP)

| **Gene ID** | **Baltz *et al*** | **Castello *et al*** | **SU_MB002** | **NSC201cb** |
| --- | --- | --- | --- | --- |
| **ANP32A** | 1 | 0 | 1 | 1 |
| **CANX** | 1 | 1 | 1 | 1 |
| **EIF4G2** | 1 | 1 | 1 | 1 |
| **EIF4A2** | 1 | 1 | 1 | 1 |
| **FSCN1** | 0 | 1 | 1 | 1 |
| **GSPT1** | 1 | 1 | 1 | 1 |
| **HNRNPU** | 1 | 1 | 1 | 1 |
| **HSP90AA1** | 1 | 1 | 1 | 1 |
| **NGRN** | 1 | 1 | 1 | 1 |
| **NONO** | 1 | 1 | 1 | 1 |
| **NUCKS1** | 1 | 0 | 1 | 1 |
| **NUFIP2** | 1 | 1 | 1 | 1 |
| **PARP1** | 1 | 1 | 1 | 1 |
| **RTN4** | 0 | 1 | 1 | 1 |
| **SON** | 1 | 1 | 1 | 1 |
| **SRP14** | 1 | 1 | 1 | 1 |
| **TNPO1** | 1 | 1 | 1 | 1 |
| **AHNAK** | 0 | 1 | 0 | 1 |
| **ANXA2** | 0 | 1 | 0 | 1 |
| **ARF1** | 1 | 0 | 0 | 1 |
| **CTNNA1** | 0 | 1 | 0 | 1 |
| **EIF5A** | 1 | 0 | 0 | 1 |
| **ENO1** | 0 | 1 | 0 | 1 |
| **FASN** | 1 | 1 | 0 | 1 |
| **GANAB** | 0 | 1 | 0 | 1 |
| **H1FX** | 1 | 0 | 0 | 1 |
| **HNRNPC** | 1 | 1 | 0 | 1 |
| **HNRNPL** | 1 | 1 | 0 | 1 |
| **HSP90AB1** | 1 | 1 | 0 | 1 |
| **JUN** | 1 | 0 | 0 | 1 |
| **KHSRP** | 1 | 1 | 0 | 1 |
| **MAP4** | 1 | 1 | 0 | 1 |
| **MEX3C** | 1 | 1 | 0 | 1 |
| **MYH9** | 1 | 0 | 0 | 1 |
| **NAP1L4** | 0 | 1 | 0 | 1 |
| **PLEC** | 0 | 1 | 0 | 1 |
| **PRRC2B** | 1 | 1 | 0 | 1 |
| **QKI** | 1 | 0 | 0 | 1 |
| **RDX** | 0 | 1 | 0 | 1 |
| **SERPINH1** | 0 | 1 | 0 | 1 |
| **SNRNP200** | 1 | 1 | 0 | 1 |
| **SRPR** | 0 | 1 | 0 | 1 |
| **ZMAT3** | 0 | 1 | 0 | 1 |
| **ARCN1** | 0 | 1 | 1 | 0 |
| **ATP5A1** | 0 | 1 | 1 | 0 |
| **BCLAF1** | 1 | 1 | 1 | 0 |
| **CAPRIN1** | 1 | 1 | 1 | 0 |
| **CCDC47** | 0 | 1 | 1 | 0 |
| **CDKN2A** | 1 | 0 | 1 | 0 |
| **CCT4** | 0 | 1 | 1 | 0 |
| **CHERP** | 1 | 1 | 1 | 0 |
| **CNBP** | 1 | 1 | 1 | 0 |
| **CSDE1** | 1 | 1 | 1 | 0 |
| **CPSF6** | 1 | 1 | 1 | 0 |
| **DDX1** | 1 | 1 | 1 | 0 |
| **DDX21** | 1 | 1 | 1 | 0 |
| **DDX3X** | 1 | 1 | 1 | 0 |
| **DEK** | 1 | 1 | 1 | 0 |
| **DHX9** | 1 | 1 | 1 | 0 |
| **DKC1** | 0 | 1 | 1 | 0 |
| **EIF1AX** | 1 | 1 | 1 | 0 |
| **EIF2S1** | 1 | 1 | 1 | 0 |
| **EIF3E** | 1 | 0 | 1 | 0 |
| **ELAVL1** | 1 | 1 | 1 | 0 |
| **EIF4B** | 1 | 1 | 1 | 0 |
| **ERH** | 1 | 0 | 1 | 0 |
| **FYTTD1** | 1 | 0 | 1 | 0 |
| **FUBP1** | 1 | 1 | 1 | 0 |
| **GDI2** | 1 | 0 | 1 | 0 |
| **G3BP1** | 1 | 1 | 1 | 0 |
| **H1F0** | 1 | 1 | 1 | 0 |
| **HDGF** | 0 | 1 | 1 | 0 |
| **HLTF** | 0 | 1 | 1 | 0 |
| **HNRNPA0** | 1 | 1 | 1 | 0 |
| **HNRNPA2B1** | 1 | 1 | 1 | 0 |
| **HNRNPA3** | 1 | 1 | 1 | 0 |
| **HMGB2** | 1 | 1 | 1 | 0 |
| **HNRNPA1** | 1 | 1 | 1 | 0 |
| **HNRNPD** | 1 | 1 | 1 | 0 |
| **HNRNPH3** | 1 | 1 | 1 | 0 |
| **HNRNPF** | 1 | 1 | 1 | 0 |
| **HNRNPH1** | 1 | 1 | 1 | 0 |
| **HNRNPH2** | 1 | 1 | 1 | 0 |
| **HNRNPR** | 1 | 1 | 1 | 0 |
| **HSPE1** | 0 | 1 | 1 | 0 |
| **HSPA9** | 1 | 1 | 1 | 0 |
| **IGF2BP1** | 1 | 1 | 1 | 0 |
| **IGF2BP3** | 1 | 1 | 1 | 0 |
| **KHDRBS1** | 1 | 1 | 1 | 0 |
| **LARP1** | 1 | 1 | 1 | 0 |
| **LBR** | 1 | 0 | 1 | 0 |
| **LARP4** | 1 | 1 | 1 | 0 |
| **LRPPRC** | 1 | 1 | 1 | 0 |
| **LIN28B** | 1 | 0 | 1 | 0 |
| **MAPRE1** | 1 | 0 | 1 | 0 |
| **MATR3** | 1 | 1 | 1 | 0 |
| **MEX3A** | 1 | 0 | 1 | 0 |
| **MRPL42** | 0 | 1 | 1 | 0 |
| **MRPS28** | 1 | 1 | 1 | 0 |
| **MSI2** | 1 | 1 | 1 | 0 |
| **MYEF2** | 1 | 0 | 1 | 0 |
| **NAP1L1** | 1 | 0 | 1 | 0 |
| **NCBP2** | 1 | 1 | 1 | 0 |
| **NOLC1** | 1 | 1 | 1 | 0 |
| **NPM1** | 1 | 1 | 1 | 0 |
| **NUDT21** | 1 | 1 | 1 | 0 |
| **NUSAP1** | 0 | 1 | 1 | 0 |
| **PABPC1** | 1 | 1 | 1 | 0 |
| **PCBP1** | 1 | 1 | 1 | 0 |
| **PCBP2** | 1 | 1 | 1 | 0 |
| **PEG10** | 1 | 1 | 1 | 0 |
| **PNN** | 1 | 1 | 1 | 0 |
| **PPP1CC** | 1 | 0 | 1 | 0 |
| **PRKDC** | 1 | 0 | 1 | 0 |
| **PTBP2** | 1 | 1 | 1 | 0 |
| **RAN** | 1 | 1 | 1 | 0 |
| **RBFOX2** | 1 | 1 | 1 | 0 |
| **RBM12** | 0 | 1 | 1 | 0 |
| **RBM14** | 1 | 1 | 1 | 0 |
| **RBMX** | 1 | 1 | 1 | 0 |
| **RPL15** | 1 | 1 | 1 | 0 |
| **RPL23A** | 1 | 1 | 1 | 0 |
| **RPL27A** | 1 | 0 | 1 | 0 |
| **RPS12** | 1 | 1 | 1 | 0 |
| **RPS23** | 1 | 0 | 1 | 0 |
| **SF3B1** | 1 | 1 | 1 | 0 |
| **SFPQ** | 1 | 1 | 1 | 0 |
| **SLBP** | 0 | 1 | 1 | 0 |
| **SMC1A** | 1 | 0 | 1 | 0 |
| **SMG1** | 1 | 0 | 1 | 0 |
| **SRSF1** | 1 | 1 | 1 | 0 |
| **SRSF2** | 0 | 1 | 1 | 0 |
| **SRSF6** | 0 | 1 | 1 | 0 |
| **STRAP** | 1 | 1 | 1 | 0 |
| **SUMO2** | 1 | 0 | 1 | 0 |
| **SYNCRIP** | 1 | 1 | 1 | 0 |
| **TFAM** | 1 | 1 | 1 | 0 |
| **TFRC** | 0 | 1 | 1 | 0 |
| **U2AF1** | 1 | 1 | 1 | 0 |
| **UPF3B** | 1 | 1 | 1 | 0 |
| **XRCC5** | 1 | 1 | 1 | 0 |
| **YWHAE** | 0 | 1 | 1 | 0 |
| **YWHAZ** | 0 | 1 | 1 | 0 |
| **ZNF638** | 1 | 1 | 1 | 0 |

**Supplementary Table 10:** SU_MB002 and NSC201cb MSI1 eCLIP bound gene annotated as LncRNA

| **Cell line** | **Log2FC** | **Strand** | **Ensembl ID** | **Gene ID** | **Binding region** |
| --- | --- | --- | --- | --- | --- |
| SU_MB002 | 3.676006578 | - | ENSG00000260032.1 | **LINC00657** | noncoding_exon |
| 3.825131127 | - | ENSG00000245910.4 | **SNHG6** | noncoding_exon |
| 3.904195725 | + | ENSG00000233137.2 | **RP11-220I1.1** | noncoding_exon |
| 3.556087385 | + | ENSG00000251562.3 | **MALAT1** | noncoding_exon |
| 3.831356997 | - | ENSG00000205663.5 | **RP11-706O15.5** | distnoncoding_intron500 |
| 4.997710964 | + | ENSG00000247556.2 | **OIP5-AS1** | noncoding_exon |
| 3.429350646 | - | ENSG00000260032.1 | **LINC00657** | noncoding_exon |
| NSC201cb | 4.733314744 | + | ENSG00000260054.1 | **RP11-611L7.1** | noncoding_exon |
| 3.305182483 | - | ENSG00000188825.9 | **LINC00910** | noncoding_exon |
| 3.688681075 | - | ENSG00000176728.3 | **TTTY14** | distnoncoding_intron500 |
| 4.166164198 | - | ENSG00000260032.1 | **LINC00657** | noncoding_exon |
| 4.810191681 | + | ENSG00000225783.2 | **MIAT** | noncoding_exon |

**Supplementary Table 11:** Top 50 polysome-associated transcripts differentially abundant (FDR<0.01) in control vs sh*MSI1* inhibited samples identified and quantified

| **ENSEMBL ID** | **GENEID** | **Fold change** | ***p*-value** |
| --- | --- | --- | --- |
| ENSG00000179743.2 | **MST1P2** | 1.499847961 | 0.00386915 |
| ENSG00000131652.9 | **THOC6** | 1.410367239 | 0.001484389 |
| ENSG00000185269.7 | **NOTUM** | 1.389393455 | 0.006047877 |
| ENSG00000177697.13 | **CD151** | 1.354322202 | 0.005839317 |
| ENSG00000165644.6 | **COMTD1** | 1.348425321 | 0.000931943 |
| ENSG00000020129.11 | **NCDN** | 1.335692878 | 0.000964438 |
| ENSG00000119383.15 | **PTPA** | 1.334193996 | 0.002659208 |
| ENSG00000156521.9 | **TYSND1** | 1.315562872 | 0.005364365 |
| ENSG00000092621.7 | **PHGDH** | 1.312024166 | 0.004493449 |
| ENSG00000136270.9 | **TBRG4** | 1.284589739 | 0.006032564 |
| ENSG00000173456.4 | **RNF26** | 1.267032772 | 0.004698971 |
| ENSG00000168476.7 | **REEP4** | 1.265832607 | 0.00125763 |
| ENSG00000095059.11 | **DHPS** | 1.258219552 | 0.002755163 |
| ENSG00000148308.13 | **GTF3C5** | 1.2514387 | 0.002497531 |
| ENSG00000198937.8 | **CCDC167** | 1.236401661 | 0.00602013 |
| ENSG00000186312.6 | **CA5BP1** | 1.234390476 | 0.000905036 |
| ENSG00000173898.7 | **SPTBN2** | 1.22416195 | 0.004929378 |
| ENSG00000068120.10 | **COASY** | 1.21793611 | 0.002618061 |
| ENSG00000113758.9 | **DBN1** | 1.21116594 | 0.005939095 |
| ENSG00000149930.13 | **TAOK2** | 1.201121449 | 0.003119549 |
| ENSG00000204356.7 | **NELFE** | 1.192791602 | 0.003632649 |
| ENSG00000114650.14 | **SCAP** | 1.189517546 | 0.003931273 |
| ENSG00000185252.13 | **ZNF74** | 1.189003602 | 0.005092699 |
| ENSG00000163156.7 | **SCNM1** | 1.159669524 | 0.005415498 |
| ENSG00000114554.7 | **PLXNA1** | 1.147781406 | 0.002047065 |
| ENSG00000089123.11 | **TASP1** | 0.779690031 | 0.005660311 |
| ENSG00000100568.6 | **VTI1B** | 0.762955768 | 0.006190014 |
| ENSG00000153879.4 | **CEBPG** | 0.730222032 | 0.004408336 |
| ENSG00000119185.8 | **ITGB1BP1** | 0.71626293 | 0.006700319 |
| ENSG00000224568.1 | **LINC01886** | 0.694487509 | 0.005797613 |
| ENSG00000147316.8 | **MCPH1** | 0.664667565 | 0.006732803 |
| ENSG00000214413.3 | **BBIP1** | 0.657047158 | 0.00600773 |
| ENSG00000143933.12 | **CALM2** | 0.625443389 | 0.002395107 |
| ENSG00000181163.9 | **NPM1** | 0.608587743 | 0.004319377 |
| ENSG00000225648.1 | **SBDSP1** | 0.60467543 | 0.002911525 |
| ENSG00000117906.9 | **RCN2** | 0.595801594 | 0.004441108 |
| ENSG00000249353.2 | **NPM1P27** | 0.585360198 | 0.002074105 |
| ENSG00000134748.12 | **PRPF38A** | 0.578071959 | 0.004686736 |
| ENSG00000197062.7 | **ZSCAN26** | 0.554782057 | 0.001300728 |
| ENSG00000111726.8 | **CMAS** | 0.54407434 | 0.00247979 |
| ENSG00000198315.6 | **ZKSCAN8** | 0.5282526 | 0.000881507 |
| ENSG00000164291.12 | **ARSK** | 0.508705373 | 0.000178418 |
| ENSG00000129515.14 | **SNX6** | 0.425462713 | 0.003220632 |
| ENSG00000181315.6 | **ZNF322** | 0.423300997 | 0.006740281 |
| ENSG00000168803.10 | **ADAL** | 0.382974686 | 0.001757012 |
| ENSG00000215630.5 | **GUSBP9** | 0.35680826 | 0.005908574 |
| ENSG00000146918.15 | **NCAPG2** | 0.300753336 | 0.006605429 |
| ENSG00000132294.9 | **EFR3A** | 0.293522273 | 0.006711303 |
| ENSG00000065243.14 | **PKN2** | 0.280822939 | 0.001273055 |
| ENSG00000126653.11 | **NSRP1** | 0.261720751 | 0.005374746 |

**Supplementary Table 12:** Top 50 proteins differentially abundant (FDR<0.01) in control vs sh*MSI1* inhibited samples identified and quantified

| **Uniprot ID** | **GENE ID** | **Fold change** | **Significant B**  ***p*-value (FDR<0.01)** |
| --- | --- | --- | --- |
|
|
|
| Q5BKX6 | **SLC45A4** | 4.846941677 | 5.80E-92 |
| P78324 | **SIRPA** | 3.347755699 | 2.54E-28 |
| P30613 | **PKLR** | 4.671123379 | 2.77E-25 |
| Q07617 | **SPAG1** | 2.329673661 | 8.02E-22 |
| P68431 | **HIST1H3A** | 2.179437941 | 1.69E-17 |
| Q13886 | **KLF9** | 2.635971199 | 1.96E-17 |
| O75494 | **SRSF10** | 2.906584799 | 4.22E-17 |
| P62805 | **HIST1H4A** | 2.131392532 | 1.73E-15 |
| P80294 | **MT1H** | 2.796504093 | 2.48E-15 |
| P04004 | **VTN** | 2.341765012 | 1.50E-14 |
| Q96HD1 | **CRELD1** | 2.438947711 | 2.44E-14 |
| P13640 | **MT1G** | 3.513815422 | 1.66E-12 |
| Q86VI3 | **IQGAP3** | 2.535168787 | 2.06E-12 |
| P20336 | **RAB3A** | 2.103624306 | 1.09E-11 |
| Q9UL25 | **RAB21** | 2.006665815 | 1.91E-11 |
| P01308 | **INS** | 1.898978317 | 8.80E-11 |
| Q96ME7 | **ZNF512** | 2.208340497 | 5.00E-10 |
| Q96AQ6 | **PBXIP1** | 1.928185476 | 6.71E-10 |
| P46013 | **MKI67** | 1.684183221 | 6.94E-10 |
| P04733 | **MT1F** | 2.174388867 | 1.47E-09 |
| Q6ZN17 | **LIN28B** | 1.88662415 | 3.93E-09 |
| Q96FQ6 | **S100A16** | 2.340069495 | 4.23E-09 |
| Q96BY9 | **SARAF** | 2.118770666 | 1.03E-08 |
| Q9Y5S1 | **TRPV2 VRL** | 2.061482458 | 1.21E-08 |
| Q58FF6 | **HSP90AB4P** | 2.0013563 | 1.39E-08 |
| P27824 | **CANX** | 1.626007741 | 1.62E-08 |
| Q5SRI9 | **MANEA** | 2.232466419 | 2.06E-08 |
| Q8NBN3 | **TMEM87A** | 1.832099759 | 3.55E-08 |
| P09917 | **ALOX5** | 2.933063832 | 7.04E-08 |
| Q9P2F8 | **SIPA1L2** | 2.001874046 | 8.18E-08 |
| P16401 | **HIST1H1B** | 1.742238787 | 8.64E-08 |
| Q9UIG0 | **BAZ1B** | 1.752624689 | 9.15E-08 |
| Q5SSJ5 | **HP1BP3** | 1.854996629 | 1.30E-07 |
| P48443 | **RXRG** | 2.030938152 | 1.48E-07 |
| Q9BZB8 | **CPEB** | 2.871469982 | 1.86E-07 |
| P02787 | **TF PRO1400** | 1.575325761 | 2.04E-07 |
| Q9BXD5 | **NPL** | 2.179095834 | 2.53E-07 |
| Q15714 | **TSC22D1** | 2.006106404 | 3.02E-07 |
| Q9BVS4 | **RIOK2** | 1.820320742 | 5.43E-07 |
| Q8IXH6 | **TP53INP2** | 2.093728856 | 7.24E-07 |
| P11021 | **HSPA5** | 1.546775346 | 7.77E-07 |
| Q14119 | **VEZF1** | 1.874691939 | 8.41E-07 |
| P11387 | **TOP1** | 1.682218394 | 1.19E-06 |
| Q8WWK9 | **CKAP2** | 1.689100083 | 1.39E-06 |
| Q9BT88 | **SYT11** | 2.03813364 | 1.90E-06 |
| Q9UN86 | **G3BP2** | 2.08688852 | 2.10E-06 |
| Q16666 | **IFI16** | 1.661222959 | 2.46E-06 |
| Q2TB10 | **ZNF800** | 2.00857166 | 3.80E-06 |
| Q12767 | **TMEM94** | 0.286376723 | 6.28E-06 |
| P35243 | **RCVRN** | 1.62841598 | 1.09681E-05 |

**Supplementary Table 13:** Top 50 genes after RRA analysis that were significantly altered by MSI1 perturbation

| **Gene** | **Score** | **eCLIP**  **logFC** | **eCLIP**  **-Log10IDR** | **RNA**  **logFC** | **RNA**  **Adj p-val** | **Polysome**  **FC** | **Polysome**  **p-value** | **Protein**  **FC** | **Protein**  **SigB** |
| --- | --- | --- | --- | --- | --- | --- | --- | --- | --- |
| **TMEM33** | 2.004E-05 | 4.0225609 | 3.7882789 | 0.5468676 | 0.00638716 | 0.7162411 | 0.01064035 | 1.46882199 | 0.0040081 |
| **FBRSL1** | 2.568E-05 | NA | NA | -0.46415 | 0.00813388 | 1.1733124 | 0.04814604 | 0.64840728 | 0.0196126 |
| **SYP** | 3.819E-05 | NA | NA | -0.632401 | 0.00020916 | 1.2562499 | 0.00906169 | 1.38817309 | 0.0513009 |
| **CHN1** | 3.943E-05 | NA | NA | -0.95098 | 2.1054E-05 | 0.5890674 | 0.07481982 | 0.78165816 | 0.0996516 |
| **TNC** | 4.61E-05 | NA | NA | -2.310781 | 1.4516E-10 | NA | NA | NA | NA |
| **SPAG1** | 8.485E-05 | NA | NA | -2.016176 | 1.1367E-08 | NA | NA | 2.32967366 | 1E-16 |
| **PLXNA1** | 9.825E-05 | NA | NA | -0.592285 | 0.00331693 | 1.1477814 | 0.00204706 | 0.77118867 | 0.0858802 |
| **SFXN3** | 0.000103 | 3.1154406 | 4.3267475 | 0.7040949 | 8.8303E-05 | 1.2905154 | 0.09885239 | 1.43528779 | 0.0017224 |
| **PTMS** | 0.0001061 | NA | NA | NA | NA | 1.3146324 | 0.02585126 | 0.59065837 | 0.0094868 |
| **RAB21** | 0.0001069 | 4.0824746 | 3.9639175 | 1.5577536 | 1.7156E-06 | NA | NA | 2.00666582 | 1E-16 |
| **PBXIP1** | 0.0001086 | NA | NA | -1.453728 | 2.7066E-08 | NA | NA | 1.92818548 | 6.706E-10 |
| **MKI67** | 0.0001137 | NA | NA | NA | NA | NA | NA | 1.68418322 | 6.936E-10 |
| **HIPK1** | 0.000166 | 3.9740581 | 4.147716 | 0.6070359 | 0.00528962 | 0.516091 | 0.08046359 | 0.6298787 | 0.0270068 |
| **RXRG** | 0.0001775 | NA | NA | 2.6928533 | 7.0676E-10 | NA | NA | 2.03093815 | 1.477E-07 |
| **ARL6IP1** | 0.0002188 | 7.2592292 | 52.577568 | 0.4651254 | 0.03900659 | 0.6377301 | 0.08401567 | 1.36818006 | 0.088115 |
| **ARL6IP5** | 0.0002387 | NA | NA | 0.8232957 | 8.0931E-05 | NA | NA | 1.65555527 | 0.0006904 |
| **EEF1A2** | 0.0003136 | NA | NA | 3.2270503 | 2.6732E-08 | 1.4016697 | 0.04478539 | 1.54014751 | 0.0008971 |
| **APOOL** | 0.0003381 | NA | NA | NA | NA | 0.5165279 | 0.04225632 | 1.2842832 | 0.0494049 |
| **ABCC4** | 0.0003657 | NA | NA | 1.2216924 | 3.8041E-07 | NA | NA | NA | NA |
| **ELAVL2** | 0.0003791 | NA | NA | -0.968007 | 0.00040565 | NA | NA | 1.33890715 | 0.0147838 |
| **TMEM245** | 0.0004211 | NA | NA | 1.2978042 | 6.8562E-06 | NA | NA | 1.53494086 | 0.0093587 |
| **HSPA14** | 0.0004552 | NA | NA | NA | NA | 0.7035168 | 0.02935022 | 1.31074982 | 0.058125 |
| **SOAT1** | 0.0004595 | 3.7305119 | 3.4256777 | 2.0358554 | 7.814E-09 | NA | NA | 1.39088547 | 0.055 |
| **ST6GALNAC5** | 0.0004849 | NA | NA | -1.128316 | 1.5458E-07 | NA | NA | 1.85609687 | 0.0001242 |
| **AGPAT5** | 0.0005025 | NA | NA | NA | NA | 0.5991401 | 0.0105837 | 1.27034819 | 0.0619576 |
| **TMSB15B** | 0.000553 | NA | NA | -0.989033 | 0.0013512 | 0.7196913 | 0.03001048 | 0.42924419 | 0.0003156 |
| **GPR180** | 0.0005731 | NA | NA | NA | NA | 0.6002032 | 0.05217023 | 1.52729707 | 0.0040838 |
| **AKT3** | 0.0005969 | NA | NA | 1.3421005 | 1.055E-06 | NA | NA | NA | NA |
| **PRDX3** | 0.000678 | NA | NA | 1.2497427 | 6.933E-07 | NA | NA | 1.46655594 | 0.0007611 |
| **MAOA** | 0.0007076 | NA | NA | 1.2562767 | 1.2765E-06 | NA | NA | 1.51241108 | 0.0002226 |
| **RAB12** | 0.0007205 | NA | NA | NA | NA | NA | NA | 1.9184592 | 2.785E-05 |
| **DBN1** | 0.0007636 | NA | NA | -0.788846 | 5.0799E-06 | 1.2111659 | 0.0059391 | NA | NA |
| **ARSK** | 0.0007926 | NA | NA | NA | NA | 0.5087054 | 0.00017842 | NA | NA |
| **ID1** | 0.0007926 | NA | NA | 5.9635835 | 5.7438E-12 | NA | NA | NA | NA |
| **INS-IGF2** | 0.0007926 | NA | NA | NA | NA | NA | NA | 1.89897832 | 1E-16 |
| **SEC23B** | 0.0007926 | NA | NA | NA | NA | NA | NA | NA | NA |
| **TRPV2** | 0.000843 | NA | NA | 0.8698743 | 0.00249904 | 1.2963345 | 0.03910161 | 2.06148246 | 1.209E-08 |
| **SOCS2** | 0.0009171 | NA | NA | -1.395216 | 4.9622E-05 | 0.6629625 | 0.06010278 | 0.70268279 | 0.0457516 |
| **SBDS** | 0.0009311 | NA | NA | NA | NA | 0.5686119 | 0.05826656 | 1.23789041 | 0.0877462 |
| **TNKS** | 0.0010628 | NA | NA | NA | NA | 0.446954 | 0.04860425 | 1.39652714 | 0.050171 |
| **CHRNA9** | 0.0010897 | NA | NA | 0.8420491 | 2.2639E-05 | 0.5649382 | 0.02905636 | NA | NA |
| **ARHGEF2** | 0.0011979 | NA | NA | -0.607666 | 0.00400676 | 1.2618586 | 0.05723325 | 1.23206083 | 0.0958593 |
| **STMN2** | 0.0012271 | NA | NA | -0.485033 | 0.004192 | NA | NA | 0.69653094 | 0.0587594 |
| **PAIP2** | 0.0013844 | NA | NA | NA | NA | 0.6428044 | 0.06724992 | 0.73141933 | 0.0476683 |
| **SLC30A1** | 0.0015448 | NA | NA | 0.7577721 | 0.00310099 | 0.5839775 | 0.06943776 | 1.41837995 | 0.0373964 |
| **ELAVL3** | 0.0015672 | NA | NA | -1.615813 | 1.5458E-07 | NA | NA | NA | NA |
| **ERCC1** | 0.0015851 | 4.4087661 | 4.7242873 | NA | NA | NA | NA | NA | NA |
| **INS** | 0.0015851 | NA | NA | NA | NA | NA | NA | 1.89897832 | 1E-16 |
| **SAMD11** | 0.0015851 | NA | NA | 6.0114594 | 5.7438E-12 | NA | NA | NA | NA |

**Supplementary Table 14:** Reactome functional interaction network MYC association with top RRA genes

| **Gene1** | **Gene2** | **Annotation** | **Direction** | **Score** |
| --- | --- | --- | --- | --- |
| CDK6 | **MYC** | Gene expression interaction: Relation of transcription factor and target gene product | <- | 1 |
| CKS1B | **MYC** | Gene expression interaction: Relation of transcription factor and target gene product | <- | 1 |
| EPN1 | **MYC** | expression regulated by | <- | 1 |
| HIPK1 | **MYC** | expression regulated by | <- | 1 |
| JUN | **MYC** | expression regulates | -> | 1 |
| LBH | **MYC** | expression regulated by | <- | 1 |
| MMP2 | **MYC** | Gene expression interaction: Relation of transcription factor and target gene product | <- | 1 |
| **MYC** | NFIC | expression regulated by | <- | 1 |
| **MYC** | NFYA | activated by; complex; input | <- | 1 |
| **MYC** | NME1 | expression regulates | -> | 1 |
| **MYC** | PIK3R1 | activated by | <- | 1 |
| **MYC** | STAT5A | Gene expression interaction: Relation of transcription factor and target gene product | <- | 1 |
| **MYC** | STAT5B | Gene expression interaction: Relation of transcription factor and target gene product | <- | 1 |
| **MYC** | THRB | Gene expression interaction: Relation of transcription factor and target gene product | <- | 1 |

**Supplementary Table 15:** HIPK1 and MYC shared annotated biological pathways

| **GO and**  **REACTOME ID** | **Biological process** |
| --- | --- |
| GO:0002376 | Immune system process |
| GO:0002520 | Immune system development |
| GO:0006464 | Cellular protein modification process |
| GO:0006468 | Protein phosphorylation |
| GO:0006793 | Phosphorus metabolic process |
| GO:0006796 | Phosphate-containing compound metabolic process |
| GO:0006807 | Nitrogen compound metabolic process |
| GO:0006915 | Apoptotic process |
| GO:0006950 | Response to stress |
| GO:0006974 | Cellular response to DNA damage stimulus |
| GO:0007154 | Cell communication |
| GO:0007165 | Signal transduction |
| GO:0007166 | Cell surface receptor signaling pathway |
| GO:0007275 | Multicellular organism development |
| GO:0007399 | Nervous system development |
| GO:0008150 | Biological process |
| GO:0008152 | Metabolic process |
| GO:0008219 | Cell death |
| GO:0008283 | Cell population proliferation |
| GO:0008284 | Positive regulation of cell population proliferation |
| GO:0009653 | Anatomical structure morphogenesis |
| GO:0009790 | Embryo development |
| GO:0009887 | Animal organ morphogenesis |
| GO:0009966 | Regulation of signal transduction |
| GO:0009987 | Cellular process |
| GO:0010033 | Response to organic substance |
| GO:0010646 | Regulation of cell communication |
| GO:0012501 | Programmed cell death |
| GO:0016043 | Cellular component organization |
| GO:0016310 | Phosphorylation |
| GO:0019221 | Cytokine-mediated signaling pathway |
| GO:0019538 | Protein metabolic process |
| GO:0022008 | Neurogenesis |
| GO:0022603 | Regulation of anatomical structure morphogenesis |
| GO:0022607 | Cellular component assembly |
| GO:0023051 | Regulation of signaling |
| GO:0023052 | Signaling |
| GO:0030097 | Hemopoiesis |
| GO:0030154 | Cell differentiation |
| GO:0032501 | Multicellular organismal process |
| GO:0032502 | Developmental process |
| GO:0033554 | Cellular response to stress |
| GO:0034097 | Response to cytokine |
| GO:0035239 | Tube morphogenesis |
| GO:0035295 | Tube development |
| GO:0035556 | Intracellular signal transduction |
| GO:0036211 | Protein modification process |
| GO:0042127 | Regulation of cell population proliferation |
| GO:0042221 | Response to chemical |
| GO:0043170 | Macromolecule metabolic process |
| GO:0043412 | Macromolecule modification |
| GO:0044085 | Cellular component biogenesis |
| GO:0044237 | Cellular metabolic process |
| GO:0044238 | Primary metabolic process |
| GO:0044260 | Cellular macromolecule metabolic process |
| GO:0044267 | Cellular protein metabolic process |
| GO:0048513 | Animal organ development |
| GO:0048518 | Positive regulation of biological process |
| GO:0048522 | Positive regulation of cellular process |
| GO:0048534 | Hematopoietic or lymphoid organ development |
| GO:0048583 | Regulation of response to stimulus |
| GO:0048699 | Generation of neurons |
| GO:0048731 | System development |
| GO:0048856 | Anatomical structure development |
| GO:0048869 | Cellular developmental process |
| GO:0050789 | Regulation of biological process |
| GO:0050793 | Regulation of developmental process |
| GO:0050794 | Regulation of cellular process |
| GO:0050896 | Response to stimulus |
| GO:0051094 | Positive regulation of developmental process |
| GO:0051239 | Regulation of multicellular organismal process |
| GO:0051240 | Positive regulation of multicellular organismal process |
| GO:0051716 | Cellular response to stimulus |
| GO:0065007 | Biological regulation |
| GO:0070887 | Cellular response to chemical stimulus |
| GO:0071310 | Cellular response to organic substance |
| GO:0071345 | Cellular response to cytokine stimulus |
| GO:0071704 | Organic substance metabolic process |
| GO:0071840 | Cellular component organization or biogenesis |
| GO:1901564 | Organonitrogen compound metabolic process |
| GO:1902531 | Regulation of intracellular signal transduction |
| GO:2000026 | Regulation of multicellular organismal development |
| GO:0005575 | Cellular component |
| GO:0005622 | Intracellular |
| GO:0005623 | Cell |
| GO:0005634 | Nucleus |
| GO:0005654 | Nucleoplasm |
| GO:0005737 | Cytoplasm |
| GO:0031974 | Membrane-enclosed lumen |
| GO:0031981 | Nuclear lumen |
| GO:0043226 | Organelle |
| GO:0043227 | Membrane-bounded organelle |
| GO:0043228 | Non-membrane-bounded organelle |
| GO:0043229 | Intracellular organelle |
| GO:0043231 | Intracellular membrane-bounded organelle |
| GO:0043232 | Intracellular non-membrane-bounded organelle |
| GO:0043233 | Organelle lumen |
| GO:0044422 | Organelle part |
| GO:0044424 | Intracellular part |
| GO:0044428 | Nuclear part |
| GO:0044444 | Cytoplasmic part |
| GO:0044446 | Intracellular organelle part |
| GO:0044464 | Cell part |
| GO:0070013 | Intracellular organelle lumen |
| GO:0003674 | Molecular function |
| GO:0003676 | Nucleic acid binding |
| GO:0003677 | DNA binding |
| GO:0005488 | Binding |
| GO:0005515 | Protein binding |
| GO:0097159 | Organic cyclic compound binding |
| GO:1901363 | Heterocyclic compound binding |
| REAC:R-HSA-212436 | Generic Transcription Pathway |
| REAC:R-HSA-73857 | RNA Polymerase II Transcription |
| REAC:R-HSA-74160 | Gene expression (Transcription) |

**Supplementary Table 16:** SU_MB002 and NSC201cb MSI1 eCLIP bound to stop codons of their target genes

| **Cell line** | **Gene name** | **Chromosome** | **Start** | **Stop** | **Strand** | **-log10*p*** | **Log2FC** |
| --- | --- | --- | --- | --- | --- | --- | --- |
| SU_MB002 | **COX7C** | chr5 | 85916483 | 85916573 | + | 14.153699 | 5.56689 |
| **GLS** | chr2 | 191797526 | 191797604 | + | 3.972774 | 3.988932 |
| **H2AFV** | chr7 | 44869663 | 44869768 | - | 3.026451 | 3.544489 |
| **ATP2A2** | chr12 | 110785207 | 110785281 | + | 6.053567 | 4.712133 |
| **CCNB1IP1** | chr14 | 20779691 | 20779784 | - | 5.31186 | 4.158675 |
| **SLC6A15** | chr12 | 85255583 | 85255670 | - | 3.5866 | 3.709468 |
| **HSPE1** | chr2 | 198367931 | 198368052 | + | 12.626707 | 4.406231 |
| **PPAT** | chr4 | 57261431 | 57261528 | - | 18.007242 | 5.787671 |
| **SRP14** | chr15 | 40328535 | 40328621 | - | 4.154761 | 3.164025 |
| **ODC1** | chr2 | 10580842 | 10580858 | - | 3.368256 | 3.78028 |
| **HNRNPA3** | chr2 | 178084014 | 178084042 | + | 4.098051 | 3.287652 |
| **SOD1** | chr21 | 33040880 | 33040992 | + | 6.68351 | 4.597048 |
| **RBBP4** | chr1 | 33146119 | 33146223 | + | 4.487784 | 3.273442 |
| **DDAH2** | chr6 | 31694847 | 31694994 | - | 4.098051 | 3.269155 |
| NSC201cb | **RGMA** | chr15 | 93588204 | 93588231 | - | 19.655077 | 3.301307 |
| **MAP4** | chr3 | 47894223 | 47894328 | - | 23.22715 | 3.83863 |
| **DDR1** | chr6 | 30867812 | 30867865 | + | 38.976167 | 6.836803 |
| **CD59** | chr11 | 33731582 | 33731685 | - | 10.843148 | 3.217104 |
| **B2M** | chr15 | 45008526 | 45008542 | + | 6.550825 | 3.729693 |
| **LUZP6** | chr7 | 135611935 | 135612059 | - | 8.381997 | 5.566891 |
| **SERF2** | chr15 | 44086144 | 44086198 | + | 5.076865 | 3.421619 |
| **APP** | chr21 | 27253915 | 27253993 | - | 27.235368 | 3.710974 |
| **SQSTM1** | chr5 | 179263638 | 179263737 | + | 34.090171 | 4.730303 |
| **SEPT11** | chr4 | 77957888 | 77957959 | + | 9.953817 | 4.391434 |
| **ATP2A2** | chr12 | 110785158 | 110785240 | + | 48.183955 | 5.745688 |
| **ANXA5** | chr4 | 122589547 | 122589643 | - | 17.45715 | 4.261117 |
| **CTSB** | chr8 | 11702589 | 11702634 | - | 8.902724 | 4.047896 |
| **SEPT11** | chr4 | 77955658 | 77955702 | + | 5.135449 | 4.65041 |
| **PTPRZ1** | chr7 | 121701247 | 121701309 | + | 35.592266 | 5.826827 |
